# Supplementary material
Source: PubMed Central journal article supplement (PMC6459117)
Supplement: jama-321-1370-s003.pdf [file jama-321-1370-s003.pdf]

## **Data Sharing Statement**

### **Data**

**Data available:** No

### **Additional Information**

**Explanation for why data not available:** Survival follow-up is still ongoing. Data will be made available once the study is completed. In the meantime, interested collaborators should contact the study team for access to data for shared projects.
